# Supplementary material for: Proton-coupled electron transfer in the reduction of diiron hexacarbonyl complexes and its enhancement on the electrocatalytic reduction of protons by a pendant basic group
Source: Royal Society of Chemistry journal article supplement (doi:10.1039/c9dt02058f), 2019-01-01
Supplement: c9dt02058f1.pdf [file c9dt02058f1.pdf]

## Electronic supplementary information

### **Proton-coupled electron transfer in the reduction of diiron hexacarbonyl complexes and its enhancement on electrocatalytic reduction of proton caused by a pendant basic group**

Wei Zhong,<sup>\*a</sup> Li Wu,<sup>a</sup> Weidong Jiang,<sup>b</sup> Yulong Li,<sup>b</sup> Natarajan Mookan<sup>a</sup> and Xiaoming Liu<sup>\*a</sup>

<sup>a</sup> College of Biological, Chemical Sciences and Engineering

Jiaying University

Jiaying, Zhejiang 314001

China

<sup>b</sup> Key Laboratory of Green Catalysis of Higher Education Institutes of Sichuan

Sichuan University of Science & Engineering

Zigong, Sichuan 643000

China

Tel./Fax: +86(0)573 83643937

E-mail: weizhong@mail.zjxu.edu.cn; xiaoming.liu@mail.zjxu.edu.cn

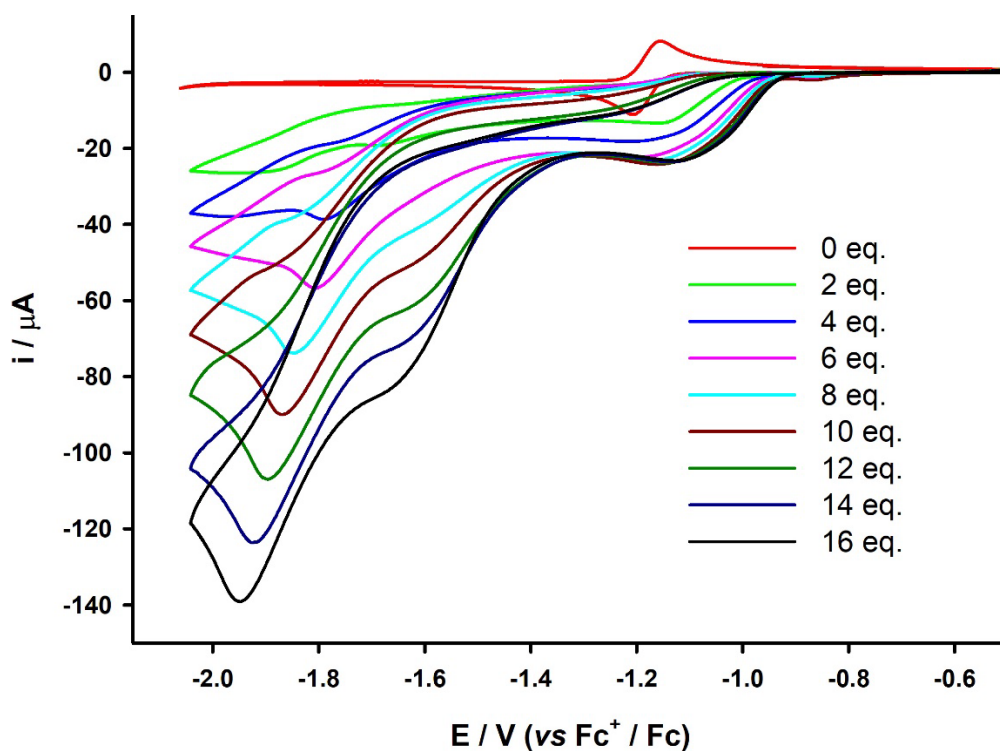

Fig. S1 CVs of complex **2** ( $c = 2.86 \text{ mmol L}^{-1}$ ) in  $0.1 \text{ mol L}^{-1}$   $[\text{NnBu}_4]\text{BF}_4/\text{MeCN}$  solution upon successive addition of  $\text{CF}_3\text{COOH}$  (scanning rate =  $0.1 \text{ V s}^{-1}$ ): 0, 2, 4, 6, 8, 10, 12, 14 and 16 equivalents.

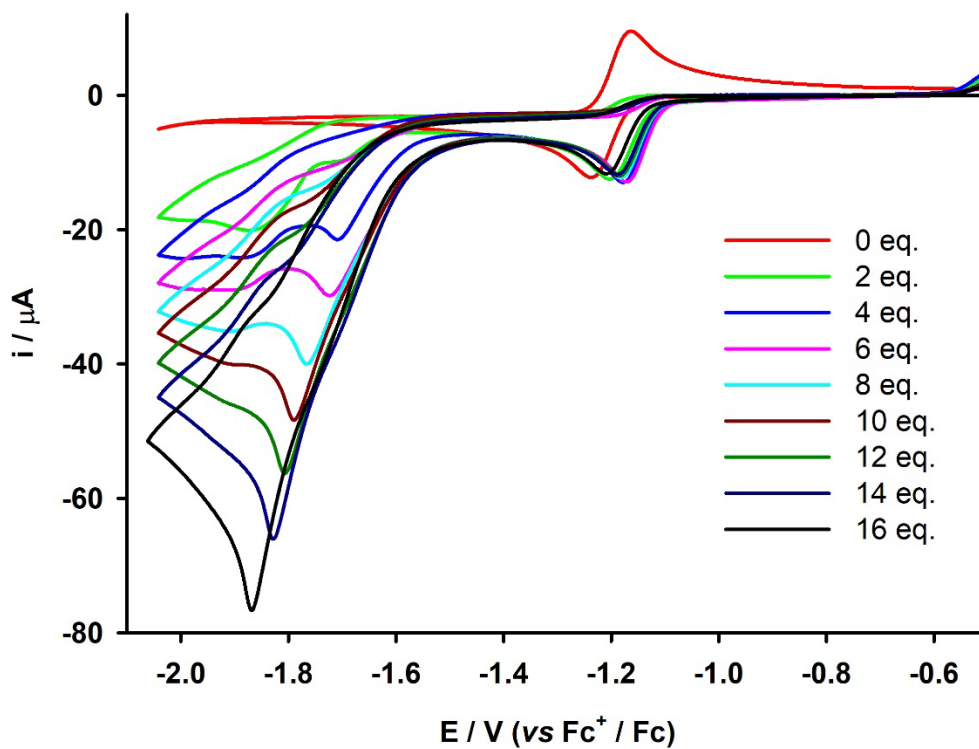

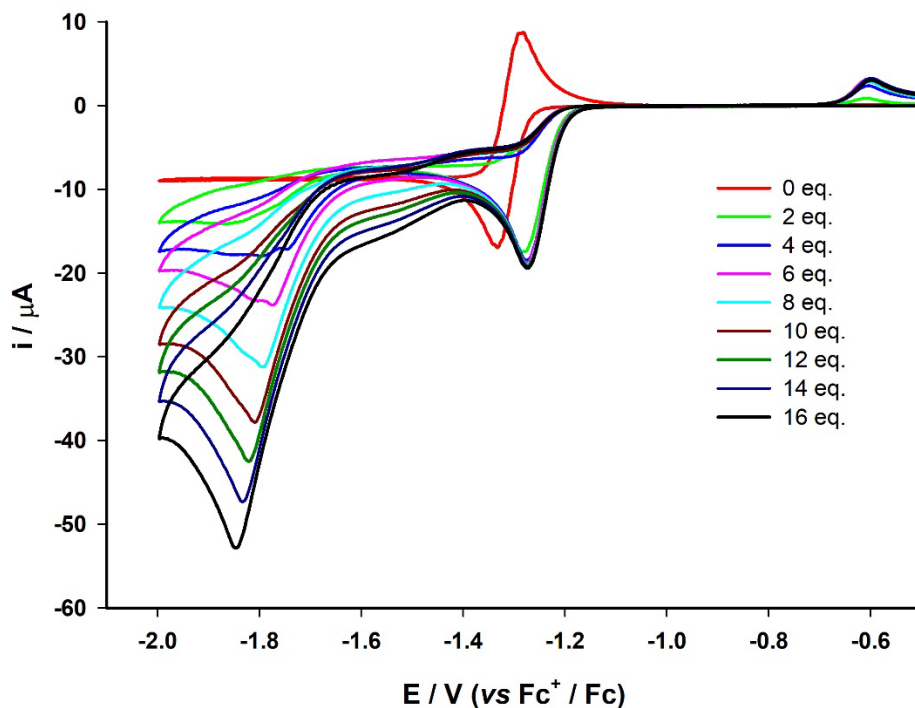

Fig. S2 CVs of complexes **3** (up) and **4** (down) ( $c = 2.86 \text{ mmol L}^{-1}$ ) in  $0.1 \text{ mol L}^{-1}$   $[\text{NnBu}_4]\text{BF}_4/\text{MeCN}$  solution upon successive addition of  $\text{CF}_3\text{COOH}$  (scanning rate =  $0.1 \text{ V s}^{-1}$ ): 0, 2, 4, 6, 8, 10, 12, 14 and 16 equivalents.

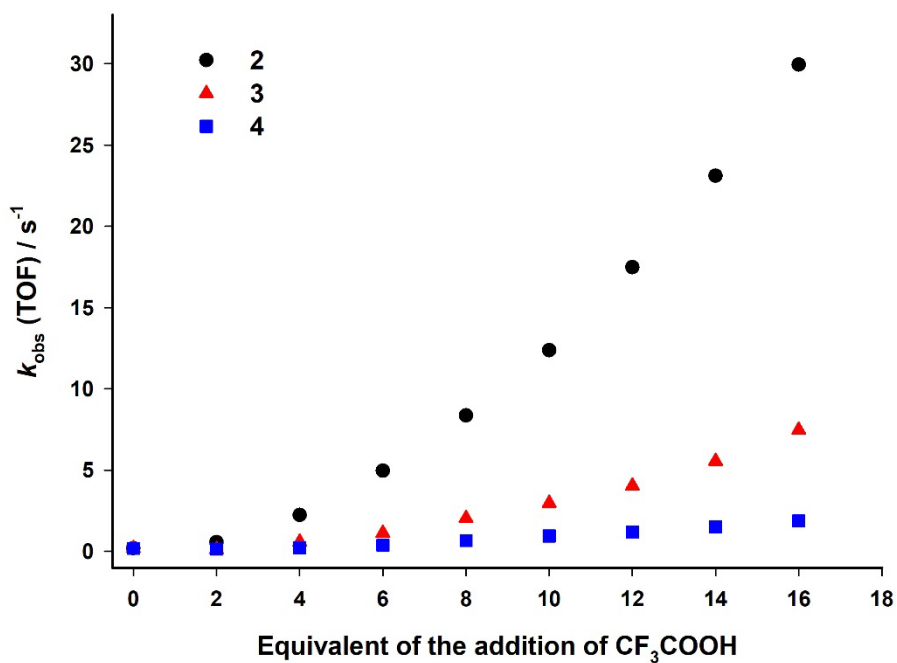

Fig. S3 Plots of  $k_{\text{obs}}$  (TOF) against the addition of  $\text{CF}_3\text{COOH}$  of complexes **2–4** ( $c = 2.86 \text{ mmol L}^{-1}$ ) at a scanning rate of  $0.1 \text{ V s}^{-1}$ .

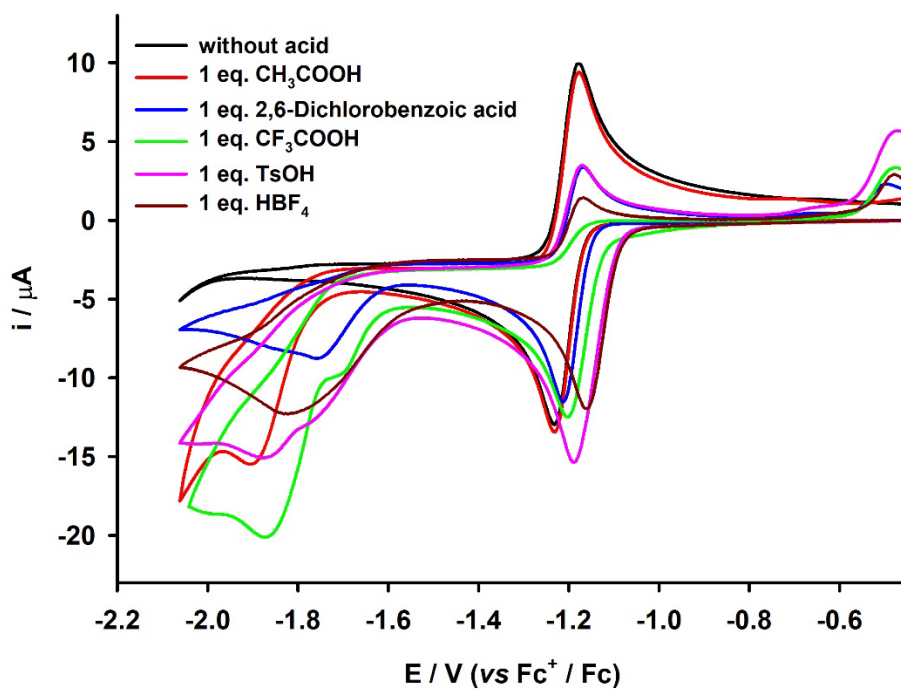

Fig.S4 CVs of complex **3** with 1 eq. of various acids in  $0.1 \text{ mol L}^{-1}$   $[\text{NBut}_4]\text{BF}_4$  / acetonitrile at room temperature.

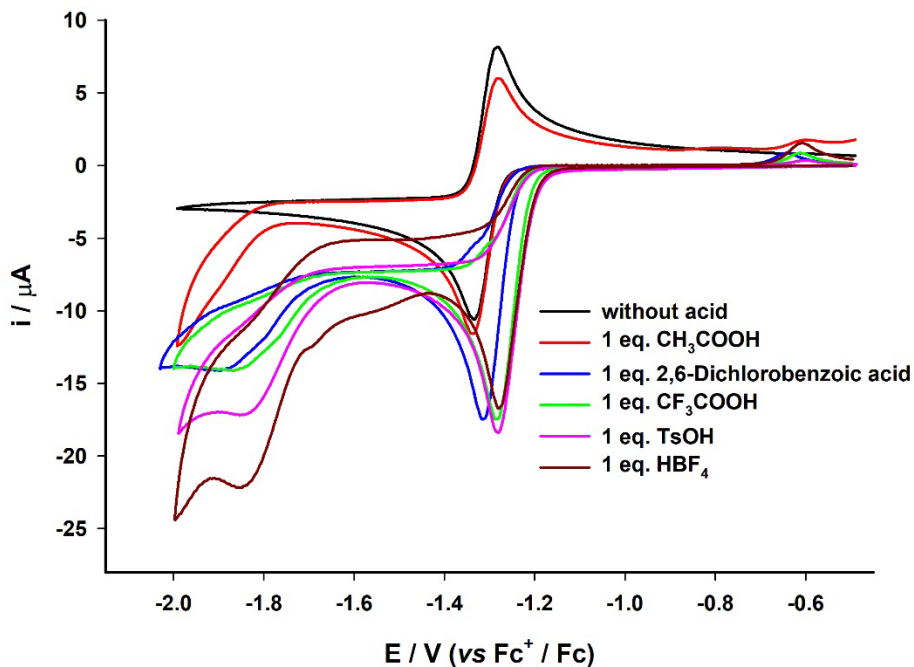

Fig.S5 CVs of complex **4** with 1 eq. of various acids in  $0.1 \text{ mol L}^{-1}$   $[\text{NBut}_4]\text{BF}_4$  / acetonitrile at room temperature.

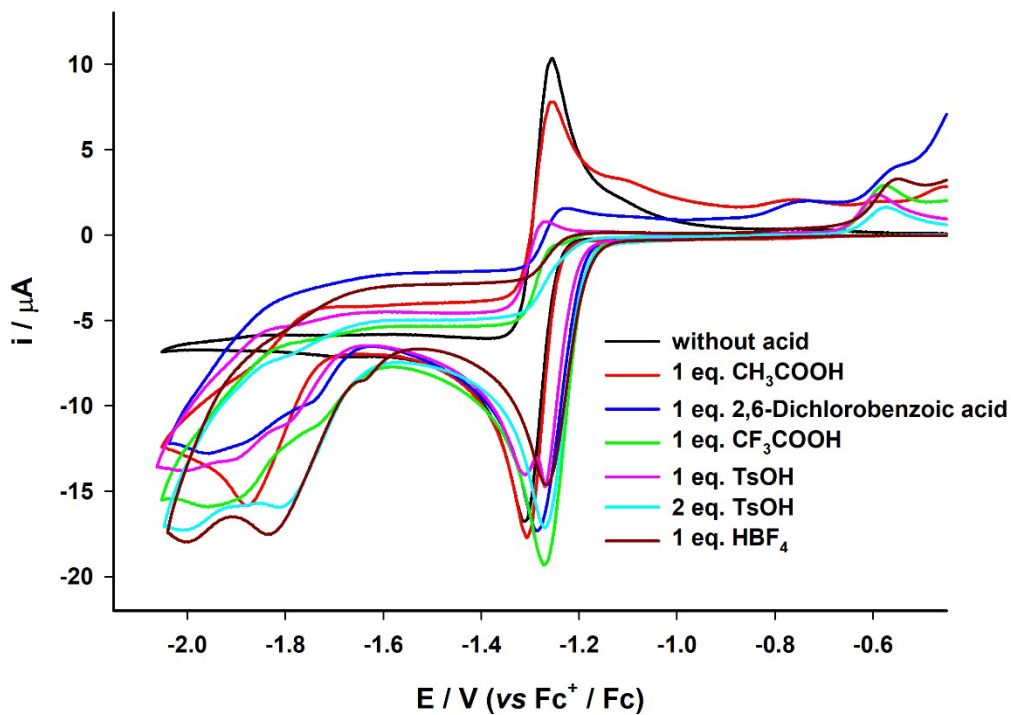

Fig.S6 CVs of complex **5** with 1 eq. of various acids in  $0.1 \text{ mol L}^{-1}$   $[\text{NBut}_4]\text{BF}_4$  / acetonitrile at room temperature.

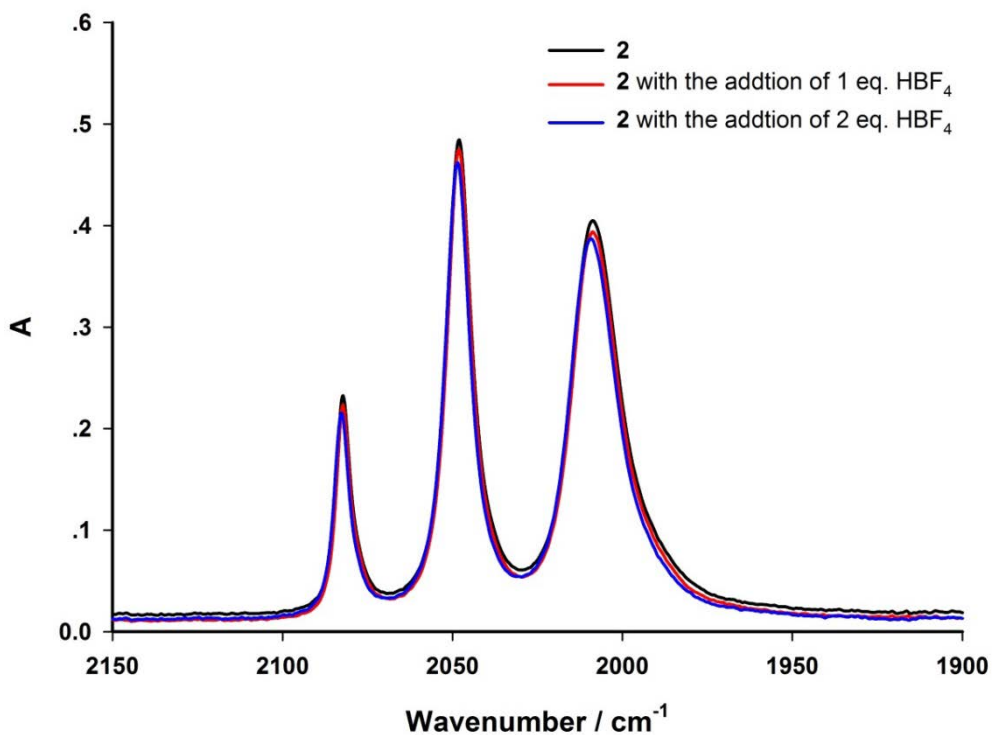

Fig.S7 FTIR spectra of complex **2** with the addition of  $\text{HBF}_4$  in  $\text{CH}_2\text{Cl}_2$ .

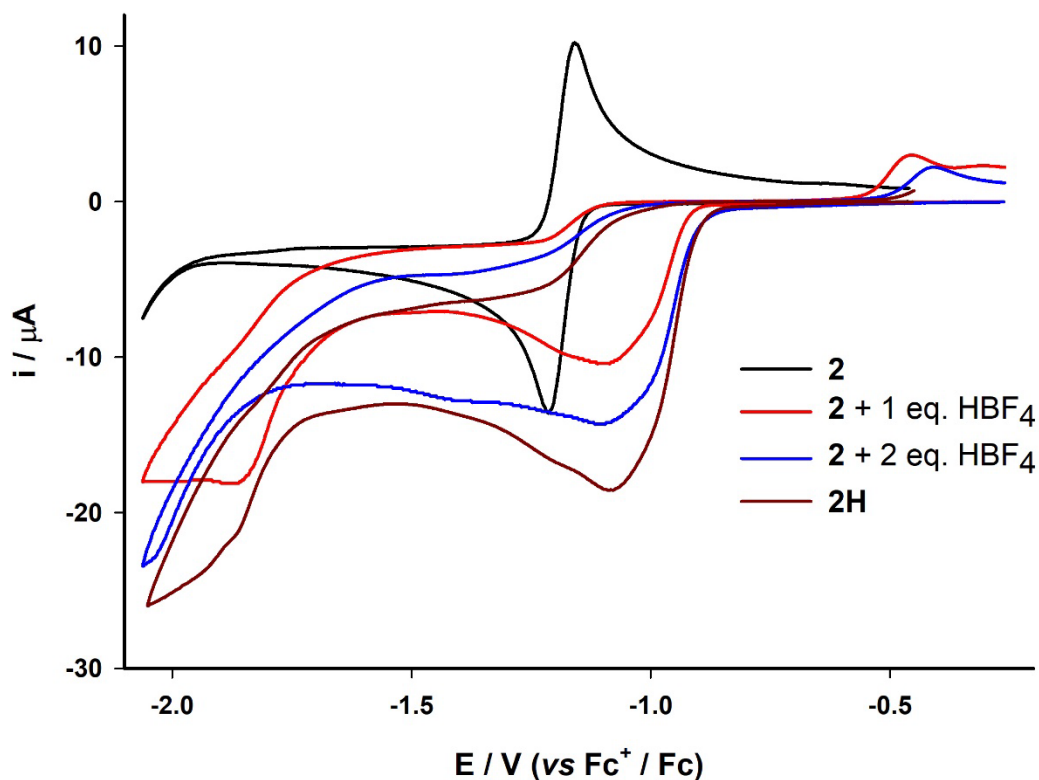

Fig.S8 Comparison of CVs of **2**, **2** with the addition of HBF<sub>4</sub> and **2H**.

Comparison of the catalytic turnover frequency (TOF) between complexes **2** and **3** in the presence of CF<sub>3</sub>COOH.

As shown in Fig. 3, the catalytic peak current ( $i_{\text{cat}}$ ) increased almost linearly with acid concentration, indicating that at fixed catalyst concentration the reaction is first order with respect to acid concentration. Thus, the catalytic turnover frequency ( $TOF$ ) of complexes **2–4** can be calculated by the following equation <sup>[1]</sup>:

$$\frac{i_{\text{cat}}}{i_{\text{p}}} = \frac{n}{0.446} \sqrt{\frac{RTk_{\text{obs}}}{Fv}}$$

where  $i_{\text{cat}}$  is the peak current in presence of acid,  $i_{\text{p}}$  is the peak current in the absence of acid,  $n$  is the number of electrons involved in the catalytic process,  $k_{\text{obs}}$  (turn over frequency,  $TOF$ ) is the observed rate constant,  $R$  is ideal gas constant,  $T$  is temperature in Kelvin (298 K),  $F$  is Faraday's constant, and  $v$  is the scanning rate. According to this equation, the values of  $TOF$  for complexes **2–4** with different equivalent of CF<sub>3</sub>COOH can be calculated and showed in Fig. S3.

**Table S1.** Crystallographic details for complexes **2–4**.

| Complex                                             | <b>2</b>                                                                                                                          | <b>3</b>                                                                       | <b>4</b>                                                                      |
|-----------------------------------------------------|-----------------------------------------------------------------------------------------------------------------------------------|--------------------------------------------------------------------------------|-------------------------------------------------------------------------------|
| CCDC number                                         | 1847707                                                                                                                           | 1847708                                                                        | 1847709                                                                       |
| Chemical formula                                    | 2(C <sub>24</sub> H <sub>10</sub> Fe <sub>2</sub> N <sub>2</sub> O <sub>10</sub> S <sub>2</sub> )•CH <sub>2</sub> Cl <sub>2</sub> | C <sub>28</sub> H <sub>16</sub> Fe <sub>2</sub> O <sub>12</sub> S <sub>2</sub> | C <sub>26</sub> H <sub>16</sub> Fe <sub>2</sub> O <sub>8</sub> S <sub>2</sub> |
| Formula weight                                      | 1409.25                                                                                                                           | 720.23                                                                         | 632.21                                                                        |
| Crystal size (mm)                                   | 0.30×0.24×0.21                                                                                                                    | 0.35×0.28×0.25                                                                 | 0.42×0.33×0.28                                                                |
| Temperature (K)                                     | 296(2)                                                                                                                            | 296(2)                                                                         | 293(2)                                                                        |
| Radiation                                           | 0.71073                                                                                                                           | 0.71073                                                                        | 0.71073                                                                       |
| Crystal system                                      | monoclinic                                                                                                                        | monoclinic                                                                     | orthorhombic                                                                  |
| Space group                                         | P2(1)/n                                                                                                                           | P2(1)/c                                                                        | Pnma                                                                          |
| <i>a</i> (Å)                                        | 17.687(4)                                                                                                                         | 12.040(2)                                                                      | 12.3381(6)                                                                    |
| <i>b</i> (Å)                                        | 16.553(4)                                                                                                                         | 17.033(3)                                                                      | 19.4322(10)                                                                   |
| <i>c</i> (Å)                                        | 18.948(4)                                                                                                                         | 15.155(3)                                                                      | 10.9337(8)                                                                    |
| <i>α</i> (°)                                        | 90                                                                                                                                | 90                                                                             | 90                                                                            |
| <i>β</i> (°)                                        | 91.001(3)                                                                                                                         | 101.646(2)                                                                     | 90                                                                            |
| <i>γ</i> (°)                                        | 90                                                                                                                                | 90                                                                             | 90                                                                            |
| V(Å <sup>3</sup> )                                  | 5547(2)                                                                                                                           | 3043.8(9)                                                                      | 2621.4(3)                                                                     |
| Z                                                   | 4                                                                                                                                 | 4                                                                              | 4                                                                             |
| $\rho$ (calc) (g/cm <sup>3</sup> )                  | 1.688                                                                                                                             | 1.572                                                                          | 1.602                                                                         |
| F (000)                                             | 2824                                                                                                                              | 1456                                                                           | 1280                                                                          |
| Absorp.coeff.<br>(mm <sup>-1</sup> )                | 1.352                                                                                                                             | 1.152                                                                          | 1.314                                                                         |
| $\theta$ range (deg)                                | 2.30 to 28.32                                                                                                                     | 2.31 to 29.01                                                                  | 3.25 to 26.00                                                                 |
| Reflns collected                                    | 51779 (R <sub>int</sub> = 0.0589)                                                                                                 | 28548 (R <sub>int</sub> = 0.0265)                                              | 7106 (R <sub>int</sub> = 0.0308)                                              |
| Indep. reflns                                       | 13688                                                                                                                             | 7894                                                                           | 2656                                                                          |
| Refns obs. [ <i>I</i> ><br>2 $\sigma$ ( <i>I</i> )] | 8328                                                                                                                              | 5753                                                                           | 1930                                                                          |
| Data/restr/paras                                    | 13688/0/748                                                                                                                       | 7894/0/399                                                                     | 2656/0/181                                                                    |
| GOF                                                 | 1.016                                                                                                                             | 1.036                                                                          | 1.092                                                                         |

|                                             |               |               |               |
|---------------------------------------------|---------------|---------------|---------------|
| $R_1/wR_2 [I > 2\sigma(I)]$                 | 0.0479/0.1085 | 0.0375/0.0952 | 0.0452/0.0935 |
| $R_1/wR_2$ (all data)                       | 0.0957/0.1276 | 0.0603/0.1125 | 0.0730/0.1058 |
| Large peak and hole<br>( $e/\text{\AA}^3$ ) | 1.233/-0.958  | 0.474/-0.358  | 0.719/-0.364  |

### Reference

1. M. L. Helm, M. P. Stewart, R. M. Bullock, M. R. DuBois and D. L. DuBois, *Science*, 2011, **333**, 863-866.
